# Supplementary material for: Development and validation of animal variant classification guidelines to objectively evaluate genetic variant pathogenicity in domestic animals
Source: PubMed Central journal article supplement (PMC11656590; doi:10.3389/fvets.2024.1497817), 2024-12-05

## Supplementary Material

Suppl. Figure S1. PRISMA 2020 flow diagram for new systematic reviews which included searches of databases, registers and other sources for selection strategies of benign and pathogenic variants.

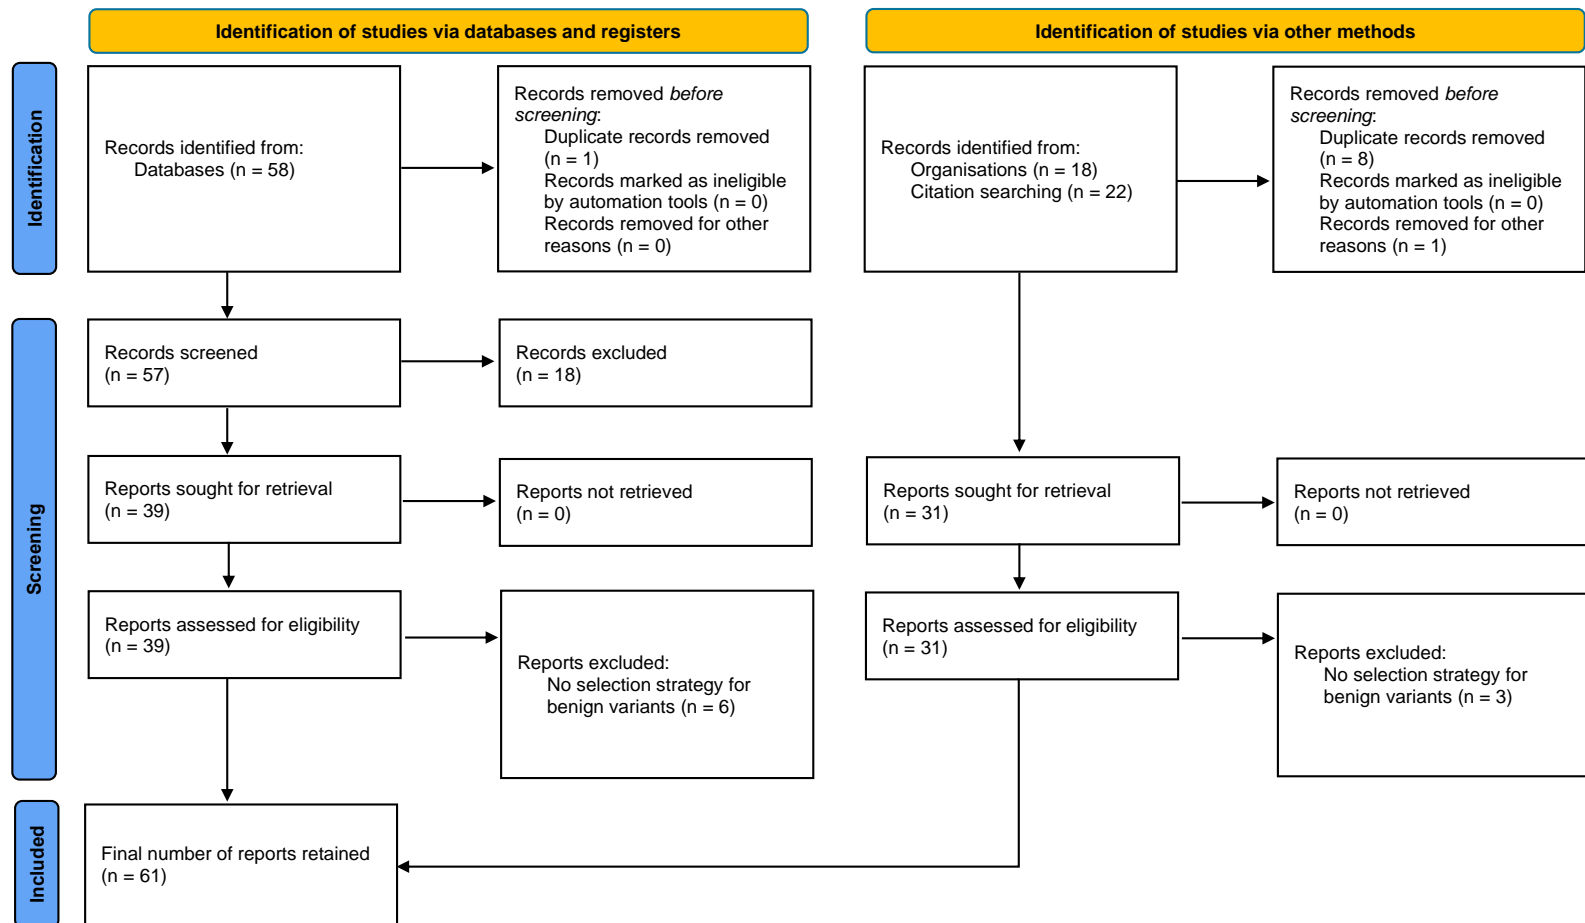

Suppl. Figure S2. PRISMA 2020 flow diagram for new systematic reviews which included searches of databases, registers and other sources for selection strategies of *in silico* tools.

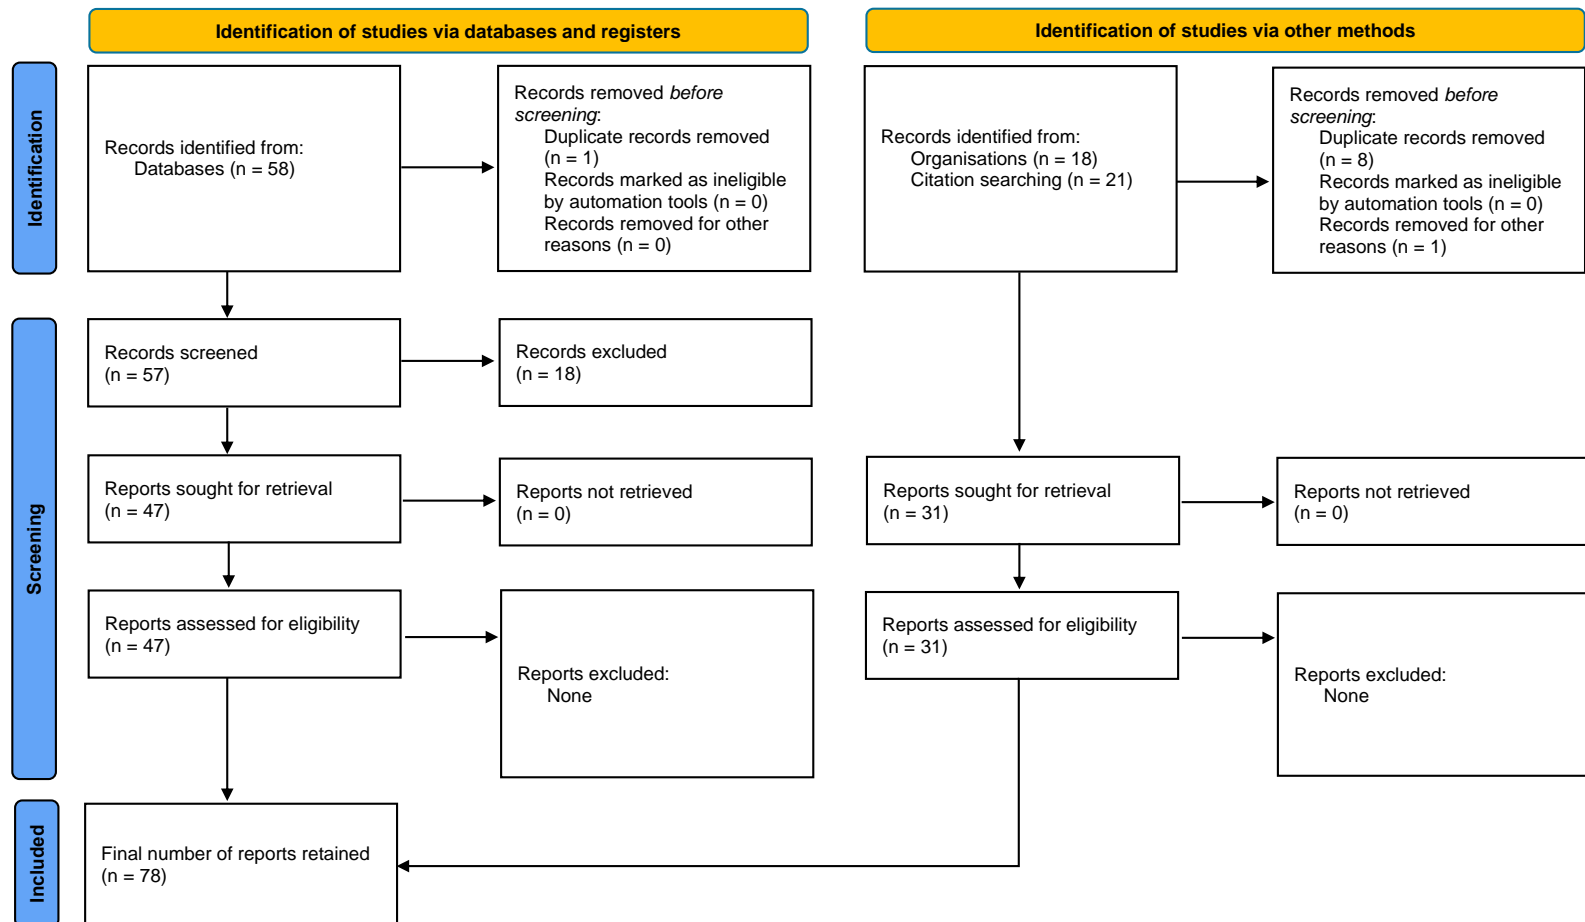

Supplement: Image_1.pdf [file Image_1.pdf]
